# Supplementary material for: Effects of a Combined Physical Activity and Educational Drama Intervention on Core Symptoms and Physical Fitness in Children with ASD
Source: Research Square preprint supplement (doi:10.21203/rs.3.rs-7999898/v1), 2025-11-24
Supplement: Supplementary file 1 [file 27d33988e5ed00055e197723.docx]

**Research Protocol：Part 1**

**Project summary**

Autism Spectrum Disorder (ASD) is characterized by social communication deficits and restricted, repetitive behaviors, often co-occurring with motor impairments. While physical activity (PA) interventions improve motor proficiency, they are limited in addressing complex socio-emotional deficits. Conversely, educational drama (ED) effectively targets social cognition and theory of mind through role-playing in safe, simulated contexts, but its efficacy can be constrained by the motor difficulties common in ASD.

This study evaluated the efficacy of a novel 12-week integrated intervention combining PA and ED, hypothesizing that their combination would yield synergistic benefits. The rationale was that PA would build foundational motor capacity, enabling more effective participation in ED, while ED would provide a meaningful, motivating context for applying motor skills and practicing social interactions.

A randomized controlled trial was conducted with 20 children with ASD (mean age ~9 years). Participants were assigned to an experimental group (PA+ED, n=10) or an active control group (conventional PA only, n=10). The intervention was delivered three times per week for 12 weeks. Core symptoms were assessed using the Repetitive Behavior Scale-Revised (RBS-R) and the Social Responsiveness Scale-2 (SRS-2). Physical fitness was evaluated with a test battery (e.g., standing long jump, balance beam walk).

It was expected that the combined PA+ED intervention would be superior to PA alone, leading to significantly greater reductions in core ASD symptoms, particularly in social communication, motivation, and stereotyped behaviors, while simultaneously improving physical fitness. The findings provide robust evidence for implementing this holistic model in special education and rehabilitation settings to concurrently address the multifaceted challenges in ASD.

**General information**

Authors: Bingxue Ma a, Xiru Dua*

Affiliation:

aGuangzhou Sports University, Guangzhou, China

* Corresponding author:

Xiru Du

College of Sports and Arts

Guangzhou Sports University

No. 1268, Guangzhou Avenue Middle, Tianhe District, Guangzhou City, Guangdong Province, Guangzhou Sports College

Tel.: +8613380025288

1. mail: [13229451204@163.com](mailto:13229451204@163.com)

Author contributions

Bingxue Ma: Conceptualization, Investigation, Methodology, Writing –original draft.

Xiru Du: Conceptualization, Funding acquisition, Supervision, Writing –review & editing.

**Rationale & background information**

Autism Spectrum Disorder (ASD) is a neurodevelopmental condition characterized by persistent deficits in social communication and interaction, alongside restricted and repetitive patterns of behavior. With its etiology incompletely understood and no specific pharmacological treatments available, evidence-based non-pharmacological interventions are the central focus of research and clinical practice.

Traditional interventions like Applied Behavior Analysis (ABA) show efficacy but often fail to generalize skills to naturalistic settings or sufficiently stimulate intrinsic social motivation. Furthermore, comorbidities are common, with deficits in Fundamental Motor Skills (FMS) being particularly prevalent—affecting up to 80% of children with ASD. These motor impairments are not isolated; they are intricately intertwined with core symptoms, creating a vicious cycle. Poor motor skills limit participation in peer play and physical activities, reducing social opportunities and exacerbating isolation. Conversely, diminished social motivation further decreases engagement in movement-based activities. This highlights an urgent need for integrated interventions that simultaneously target both social-communication deficits and motor skill impairments.

Within this context, Physical Activity (PA) interventions offer distinct advantages. Systematic exercise programs directly enhance strength, coordination, balance, and motor proficiency. Beyond the motor domain, the inherent structure of these activities—involving rule-following, turn-taking, and teamwork—creates a natural training ground for social cognition and adaptive behaviors. Evidence also indicates PA can reduce stereotyped behaviors and anxiety, indirectly benefiting core symptoms. However, purely exercise-based interventions remain relatively indirect for eliciting complex socio-emotional responses and enhancing theory of mind, limiting their overall effectiveness in these critical areas.

Conversely, Educational Drama (ED) or Drama Therapy shows considerable potential. It utilizes theatrical elements like role-playing and improvisation to allow children to experience different roles and social scenarios within a safe, fictional context. This embodied practice translates abstract social rules into concrete, actionable behaviors, alleviating the immediate stress of social situations. Empirical evidence confirms that drama-based interventions can significantly improve emotional recognition, communication, and social interaction. However, their effectiveness can be constrained by the motor impairments common in ASD, as these activities require a certain level of physical expressiveness and motor ability.

In summary, PA and ED interventions are theoretically highly complementary and potentially synergistic. PA provides a solid foundation for the bodily expression required in drama, while ED offers a socially and emotionally meaningful context for applying motor skills. This integrated approach is expected to operate through a bidirectional pathway: improved motor skills enhance engagement and confidence in drama activities, while the social motivation elicited by drama encourages more active participation in physical activities. Despite individual supporting evidence, the systematic integration of both into a unified program and a scientific evaluation of its combined effects on core ASD symptoms and motor skills remains unexplored. A significant gap exists, with a lack of randomized controlled trials investigating potential synergistic benefits. This study is designed to address this critical gap.

**Study goals and objectives**

The primary objective of this randomized controlled trial was to evaluate the efficacy of a novel 12-week integrated intervention, combining structured physical activity with educational drama, in ameliorating core autism symptoms and enhancing physical fitness among school-aged children with Autism Spectrum Disorder (ASD). We hypothesized that this synergistic approach would yield superior outcomes compared to conventional physical activity alone. The study specifically aimed to determine whether the combined intervention would produce significantly greater reductions in core deficits, as measured by standardized scales for repetitive behaviors and social responsiveness, with a focus on social communication, motivation, and autistic mannerisms, while simultaneously assessing its impact on a battery of physical fitness indicators.

**Study Design**

This study adopted a 2 (time: pre-test, post-test) × 2 (group: experimental group, control group) mixed experimental design, with time as the within-subjects factor and group as the between-subjects factor. The study was conducted between June and September 2025 in Foshan City, Guangdong Province, China. The study protocol received approval from the Ethics Committee of Guangzhou Sport University (Approval No.: 2025LCLL-067) and was registered with the Chinese Clinical Trial Registry (Registration No.: CTR2500103810). This investigation was conducted in accordance with the Declaration of Helsinki. Informed consent was obtained from all parents/legal guardians of the participants prior to their inclusion in the study.

Table 1. Inclusion and Exclusion Criteria of the Study Participants

| Inclusion Criteria: | Exclusion Criteria: |
| --- | --- |
| 1）Diagnosed with Autism Spectrum Disorder (ASD) in accordance with the Diagnostic and Statistical Manual of Mental Disorders, Fifth Edition (DSM-5) criteria； | 1）Presence of other neurological, psychiatric, or cardiovascular disorders； |
| 2）Participant’s guardian provided informed consent for participation in the study； | 2）Recent use of medications affecting the central nervous system； |
| 3）No comorbid neurological or psychiatric disorders. | 3）Visual or auditory impairments； |
|  |  |

**Experimental Group**

The Physical Activity combined with Educational Drama intervention consisted of three progressive stages: adaptation, fundamental, and advanced phases (Table 2). Each session followed a structured sequence comprising a warm-up, foundational training, core activity, and relaxation segment ( Table 3). The intervention dosage was as follows: (1) each session lasted 30 minutes; (2) exercise intensity was maintained at a moderate level, corresponding to 60-69% of the participant’s maximum heart rate (maximum heart rate = 220-age); (3) the intervention period lasted 12 weeks（2025.6.15-2025.9.10）; and (4) sessions were conducted three times per week.

The intervention was primarily delivered by graduate students majoring in Physical Education who held official teaching qualifications. Instruction was conducted in group sessions. Given that children with autism often have difficulty participating independently, their guardians were encouraged to accompany them during the sessions. To ensure consistent attendance and maximize the effectiveness of the intervention, strict attendance records were maintained for each class; participants were not permitted to miss more than three consecutive sessions or more than seven sessions in total. In addition, during each session, two children with autism were randomly selected to wear Polar heart rate monitors to assess exercise intensity. Across the 12-week intervention period, the mean heart rate of the experimental group was 136.21 ± 6.19 beats/min, corresponding to a moderate-intensity level.

**Control Group**

The control group intervention followed a structured program consisting of three progressive stages: adaptation, fundamental, and advanced phases (Table 6). Each session included a warm-up, foundational training, core activity, and relaxation segment (Table 7). The intervention dosage, intensity, and frequency were consistent with those of the Physical Activity combined with Educational Drama group. The sessions were primarily conducted by graduate students majoring in Physical Education who held official teaching qualifications, using a group-based instructional format.

**Methodology**

**Measurement of Core Symptoms**

**Repetitive Behaviors**

The Repetitive Behavior Scale–Revised (RBS-R) is a validated instrument for assessing stereotyped behaviors in children with autism[15]. The scale comprises 43 items across six subdomains: stereotyped behavior, self-injurious behavior, compulsive behavior, ritualistic behavior, sameness behavior, and restricted behavior. Items are rated on a 4-point scale, where 3 indicates severe behavioral problems, 2 indicates moderate problems, 1 indicates mild problems, and 0 indicates no problems. Higher scores reflect greater severity of repetitive and stereotyped behaviors. The scale is completed by the child’s primary caregiver based on the child’s behavior over the past three months, with the same caregiver completing both pre- and post-intervention assessments to ensure consistency.

**Social Impairment**

Social responsiveness was assessed using the Social Responsiveness Scale, Second Edition (SRS-2) [16]. The 65-item instrument comprises five subscales: Social Awareness, Social Cognition, Social Communication, Social Motivation, and Restricted Interests and Repetitive Behaviors. Items are rated on a 4-point Likert scale, where 3 indicates severe behavioral problems, 2 moderate problems, 1 mild problems, and 0 indicates no observable behavioral problems. Higher total scores reflect more severe social impairment. The scale was completed by guardians based on the child's typical behavior over the preceding three-month period, with the same informant completing the scale at all assessment time points.

**Childhood Autism Rating Scale (CARS)**

The Childhood Autism Rating Scale (CARS) (Schopler et al., 1980) was administered at baseline only. The total scores range from 0 to 60, with the following clinical cutoffs: a score below 30 indicates a non-autistic classification; a score of 30 or above leads to an autism classification. Within the autism spectrum, scores of 30-37 are classified as mild-to-moderate autism, while scores ranging from 37 to 60, accompanied by at least five items rated above 3, are classified as severe autism.[17].

**Measurement of Basic Physical Fitness**

Based on the school's physical fitness testing schedule and the content of fundamental movement skill assessment scales, the basic physical fitness test battery was determined to comprise the following items: standing long jump, tennis ball throw, balance beam walk, shuttle run, and two-foot continuous jump.

**Standing Long Jump**: The participant stood behind the take-off line with feet naturally apart, assumed a semi-squat position, and swung the arms backward with appropriate flexion. Subsequently, the arms were swung forward forcefully while the feet pushed off the ground to jump forward as far as possible. Two trials were performed, and the better result was recorded.

**Tennis Ball Throw**: Facing the throwing direction, the participant stood approximately one step behind the throwing line with feet in a staggered stance. Holding a tennis ball with one hand overhead, the participant threw it forward as far as possible. A forward step with the rear foot was permitted during the release, but neither foot could touch or cross the throwing line.

**Balance Beam Walk**: The balance beam was 15 cm in height, 3 m in length, and 20 cm in width. Starting from a platform behind the "start line" of the beam, the participant stood with arms abducted to the side and then walked forward by alternating steps. Test personnel walked alongside the beam to observe performance and prevent accidents. Timing stopped when either foot contacted the "end line."

**Shuttle Run**: Beginning in a standing start position, timing commenced upon a verbal signal. The participant ran to a turn-around point, touched a designated object, turned, and ran back to the finish line, at which point timing was stopped. The total running distance was 10 meters.

**Two-Foot Continuous Jump**: Ten soft blocks were placed in a straight line on level ground at 50 cm intervals. A "start line" was marked 20 cm from the first block, and a "finish line" was marked 20 cm beyond the last block. With feet together behind the start line, the participant performed a two-footed jump consecutively over all ten blocks without stopping.

**Statistical Analysis**

All statistical analyses were performed using SPSS (Version 27.0). The normality of continuous variables was assessed using the Shapiro‑Wilk test, and descriptive statistics are presented as mean ± standard deviation. For data conforming to a normal distribution, independent samples t‑tests were used to examine baseline differences between the two groups. A two‑way repeated‑measures analysis of variance (ANOVA) was then conducted, with group (intervention vs. control) as the between‑subjects factor and time (pre‑intervention vs. post‑intervention) as the within‑subjects factor. The Bonferroni correction was applied for post‑hoc comparisons, and the Greenhouse‑Geisser correction was used when the assumption of sphericity was violated. In cases of a significant interaction effect, simple effect analyses were performed. A p‑value < 0.05 was considered statistically significant.

**Safety considerations**

Throughout the intervention period, participants' heart rate was continuously monitored to ensure exercise safety and mitigate potential risks.

**Follow-up**

Upon completion of the intervention phase, this study will continue with longitudinal follow-up assessments to monitor participants' developmental trajectory.

**Data management and statistical analysis**

All statistical analyses were performed using SPSS (Version 27.0). The normality of continuous variables was assessed using the Shapiro‑Wilk test, and descriptive statistics are presented as mean ± standard deviation. For data conforming to a normal distribution, independent samples t‑tests were used to examine baseline differences between the two groups. A two‑way repeated‑measures analysis of variance (ANOVA) was then conducted, with group (intervention vs. control) as the between‑subjects factor and time (pre‑intervention vs. post‑intervention) as the within‑subjects factor. The Bonferroni correction was applied for post‑hoc comparisons, and the Greenhouse‑Geisser correction was used when the assumption of sphericity was violated. In cases of a significant interaction effect, simple effect analyses were performed. A p‑value < 0.05 was considered statistically significant.

**Expected outcomes of the study**

This study offers significant practical utility for children with ASD by providing a validated, holistic intervention model that can be directly implemented in special education schools and rehabilitation centers. The integrated physical activity and educational drama approach simultaneously addresses both core social communication deficits and co-occurring motor impairments, breaking the vicious cycle that often perpetuates these difficulties. By demonstrating that drama-based social training becomes more effective when supported by improved physical competence, this research provides educators and therapists with a structured, dual-focus curriculum. The findings empower practitioners to move beyond single-domain interventions, offering a practical framework to enhance children's social motivation, reduce stereotyped behaviors, and build physical confidence within engaging, meaningful activities that promote skill generalization to real-world settings.

In terms of knowledge advancement, this research makes several key contributions to the field. It provides empirical evidence for a novel theoretical framework that posits synergistic effects between motor and social interventions—an area previously underexplored in ASD literature. The study moves beyond demonstrating that these interventions work separately to show how their integration creates bidirectional benefits: physical activity enhances drama engagement, while drama provides social meaning to motor skills. Furthermore, it identifies specific intervention mechanisms, revealing that the combined approach particularly improves complex social-cognitive domains like theory of mind and social motivation, which are less responsive to conventional exercise alone. These findings challenge siloed intervention approaches and establish a new evidence base for multi-component treatments, ultimately advancing our understanding of how to simultaneously target the interconnected social-motor challenges in ASD.

**Ethics**

This study has been approved by the Guangzhou Sport University Research Ethics Committee (102772021RT067) .

**Informed consent forms**

As detailed in the attached file.

**Reference**

1. Posar, A., F. Resca, and P. Visconti, Autism according to diagnostic and statistical manual of mental disorders 5(th) edition: The need for further improvements. Journal of Pediatric Neurosciences, 2015. 10(2): p. 146-148.

2. Maenner, M.J., Prevalence and characteristics of autism spectrum disorder among children aged 8 years—Autism and Developmental Disabilities Monitoring Network, 11 sites, United States, 2020. MMWR. Surveillance Summaries, 2023. 72.

3. Yu, Q., et al., Efficacy of interventions based on applied behavior analysis for autism spectrum disorder: a meta-analysis. Psychiatry investigation, 2020. 17(5): p. 432.

4. Gandotra, A., et al., Fundamental movement skills in children with autism spectrum disorder: A systematic review. Research in Autism Spectrum Disorders, 2020. 78: p. 101632.

5. MacDonald, M., C. Lord, and D. Ulrich, The relationship of motor skills and adaptive behavior skills in young children with autism spectrum disorders. Research in autism spectrum disorders, 2013. 7(11): p. 1383-1390.

6. Ji, Y.-Q., et al., Effectiveness of exercise intervention on improving fundamental motor skills in children with autism spectrum disorder: a systematic review and meta-analysis. Frontiers in Psychiatry, 2023. 14: p. 1132074.

7. Ye, Y., et al., The effects of the exercise intervention on fundamental movement skills in children with attention deficit hyperactivity disorder and/or autism spectrum disorder: A Meta-Analysis. Sustainability, 2023. 15(6): p. 5206.

8. Tyler, K., M. MacDonald, and K. Menear, Physical activity and physical fitness of school‐aged children and youth with autism spectrum disorders. Autism research and treatment, 2014. 2014(1): p. 312163.

9. Wu, Y., et al., The effect of physical exercise therapy on autism spectrum disorder: a systematic review and meta-analysis. Psychiatry Research, 2024. 339: p. 116074.

10. Stratou, E., et al., The effect of drama in education on social skills development of children with autism spectrum disorders (ASD). International Journal of Caring Sciences, 2023. 16(1): p. 464-473.

11. Bololia, L., et al., Dramatherapy for children and adolescents with autism spectrum disorder: A systematic integrative review. The Arts in Psychotherapy, 2022. 80: p. 101918.

12. Kechen, L., S.C. Cheang, and S. Zainal, A Study on Drama Therapy to Promote Imagination Development of Autistic Children--A Case Study in Guangxi, China. Pakistan Journal of Life & Social Sciences, 2024. 22(2).

13. Rahimi Pordanjani, S., Effectiveness of drama therapy on social skills of autistic children. Practice in Clinical Psychology, 2021. 9(1): p. 9-18.

14. O'Leary, K., The effects of drama therapy for children with autism spectrum disorders. 2013.

15. Bodfish, J.W., et al., Varieties of repetitive behavior in autism: Comparisons to mental retardation. Journal of autism and developmental disorders, 2000. 30(3): p. 237-243.

16. Bruni, T.P., Test review: Social responsiveness scale–Second edition (SRS-2). Journal of Psychoeducational Assessment, 2014. 32(4): p. 365-369.

17. Schopler, E., et al., Toward objective classification of childhood autism: Childhood Autism Rating Scale (CARS). Journal of Autism and Developmental Disorders, 1980. 10(1): p. 91-103.

18. Bremer, E., M. Crozier, and M. Lloyd, A systematic review of the behavioural outcomes following exercise interventions for children and youth with autism spectrum disorder. Autism, 2016. 20(8): p. 899-915.

19. Liang, X., et al., The effects of exercise interventions on executive functions in children and adolescents with autism spectrum disorder: a systematic review and meta-analysis. Sports Medicine, 2022. 52(1): p. 75-88.

20. Corbett, B.A., et al., Treatment effects in social cognition and behavior following a theater-based intervention for youth with autism. Developmental neuropsychology, 2019. 44(7): p. 481-494.

21. Dogru, S.S.Y., The effect of creative drama on pre-teaching skills and social communication behaviors of children with autism. Studies on Ethno-Medicine, 2015. 9(2): p. 181-189.

22. Baron-Cohen, S., A.M. Leslie, and U. Frith, Does the autistic child have a “theory of mind”? Cognition, 1985. 21(1): p. 37-46.

23. Sowa, M. and R. Meulenbroek, Effects of physical exercise on autism spectrum disorders: A meta-analysis. Research in autism spectrum disorders, 2012. 6(1): p. 46-57.

24. Mpella, M., et al., The Effects of a Theatrical Play Programme on Social Skills Development for Young Children with Autism Spectrum Disorders. International Journal of Special Education, 2019. 33(4): p. 828-845.

25. Manna, N., Velvi's Theatre Intervention for Children with Autism Spectrum Disorder (ASD): An Assessment of Effect of Drama Therapy. Indian Journal of Health & Wellbeing, 2021. 12(3).

26. Lerner, M.D. and A.Y. Mikami, A preliminary randomized controlled trial of two social skills interventions for youth with high-functioning autism spectrum disorders. Focus on Autism and Other Developmental Disabilities, 2012. 27(3): p. 147-157.

27. D’Amico, M., C. Lalonde, and S. Snow, Evaluating the efficacy of drama therapy in teaching social skills to children with Autism Spectrum Disorders. Drama Therapy Review, 2015. 1(1): p. 21-39.

28. Toscano, C.V., et al., Exercise improves the social and behavioral skills of children and adolescent with autism spectrum disorders. Frontiers in psychiatry, 2022. 13: p. 1027799.

29. Toscano, C.V., H.M. Carvalho, and J.P. Ferreira, Exercise effects for children with autism spectrum disorder: metabolic health, autistic traits, and quality of life. Perceptual and motor skills, 2018. 125(1): p. 126-146.

30. Bhat, A.N., R.J. Landa, and J.C. Galloway, Current perspectives on motor functioning in infants, children, and adults with autism spectrum disorders. Physical therapy, 2011. 91(7): p. 1116-1129.

**Research Protocol：Part 2**

**Curriculum Vitae of investigators**

**Bingxue Ma：**

Guangzhou Sport University, Master of Physical Education (Sports Dance), Class of 2025. Possesses a combined background in dance performance and physical education, with a focus on research and practice in sports dance.

Solid Academic Research Capabilities

1. Contributed to the development and authorized granting of the national utility model patent "A Posture Training Device for Latin Dance".
2. Proficient in data analysis tools such as SPSS and CiteSpace, with a foundational grasp of research methodology in sports science.

Substantial Professional Practice Achievements

1. Teaching Experience: Served as a dance teacher at Inner Mongolia Arts University, a physical education teacher and homeroom teacher at Shunde Qizhi School, and a cheerleading coach at multiple schools in Guangzhou. Skilled in classroom organization and interdisciplinary teaching, leading student teams to win awards at municipal-level competitions.
2. Public Welfare Innovation: Awarded the Guangdong "Zhongchuang Cup" Disability Public Competition Excellence Award and the "Challenge Cup" Entrepreneurship Competition Bronze Award. Organized cultural and sports activities for special needs students and received the "Public Welfare Angel" honorary title.

**Xiru Du:**

Full Professor (Third-Class), Ph.D., at the School of Sports and Arts, Guangzhou Sport University, and serves as an Adjunct Doctoral Supervisor at Shanghai University of Sport. Her primary work focuses on teaching, research, and community engagement in the fields of leisure sports, women in sports, and adapted physical activity. She previously held the position of Board Member of the Guangdong Provincial Society of Sports Science and is currently a member of the China Sport Science Society, as well as the Chair of the Committee for Children with Disabilities under the Guangdong Provincial Physical Fitness Association.

**Financing and insurance**

The research work presented in this paper was supported by the 2023 Guangdong Provincial Education Science Planning Fund (Natural Science), and I am the author of this study (Project Number: 2023GXJK006). The funding did not and will not have any implication on the design of the study, collection, analysis, and interpretation of data, or in writing the manuscript.
